# Supplementary material
Source: publisher figshare collection journal article supplement (https://acs.figshare.com/ndownloader/files/4605457)
Supplement: Supplementary file 1 [file 4605457]

*Supporting Information: SAM and Solution Resistance Data*

Additional Impedimetric fitting data for the solution and SAM resistance used to determine the SAM capacitance are included below.

**Table S1: Additional Electro-polished Dodecanethiol Impedance Fitting Data**

| <b>Electrode:</b>          | <u>A</u>    | <u>B</u>    | <u>C</u>   | <u>D</u>     | <u>E</u>     |
|----------------------------|-------------|-------------|------------|--------------|--------------|
| <b>Solution Resistance</b> | 1.19        | 1.15        | 1.23       | 1.18         | 1.20         |
|                            | $\pm 0.02$  | $\pm 0.01$  | $\pm 0.02$ | $\pm 0.03$   | $\pm 0.05$   |
| <b>SAM Resistance</b>      | 107.20      | 259.10      | N/A*       | 638.97       | 309.90       |
|                            | $\pm 11.17$ | $\pm 107.9$ | N/A*       | $\pm 412.76$ | $\pm 158.25$ |

\*This SAM was fit with a Helmholtz instead of a Randles Circuit as its resistance approached infinity

**Table S2: Additional Electro-polished Azacrown Impedance Fitting Data**

| <b>Electrode:</b>          | <u>A</u>    | <u>B</u>    | <u>C</u>    | <u>D</u>    | <u>E</u>   |
|----------------------------|-------------|-------------|-------------|-------------|------------|
| <b>Solution Resistance</b> | 1.33        | 1.32        | 1.31        | 1.26        | 1.28       |
|                            | $\pm 0.03$  | $\pm 0.02$  | $\pm 0.01$  | $\pm 0.02$  | $\pm 0.04$ |
| <b>SAM Resistance</b>      | 381.63      | 141.63      | 150.07      | 182.20      | 66.39      |
|                            | $\pm 87.24$ | $\pm 23.72$ | $\pm 16.58$ | $\pm 21.06$ | $\pm 7.13$ |

**Table S3: Additional Unpolished Azacrown Impedance Fitting Data**

| <b>Electrode:</b>          | <u>F</u> | <u>G</u> | <u>H</u> | <u>I</u> |
|----------------------------|----------|----------|----------|----------|
| <b>Solution Resistance</b> | 4.24     | 4.57     | 4.51     | 4.44     |
|                            | 0.04     | 0.03     | 0.02     | 0.05     |
| <b>SAM Resistance</b>      | 3.77     | 67.89    | 53.31    | 46.18    |
|                            | 0.9      | 2.45     | 2.03     | 1.59     |
